# Supplementary material for: Better Drought Index between SPEI and SMDI and the Key Parameters in Denoting Drought Impacts on Spring Wheat Yields in Qinghai, China
Source: MDPI journal article supplement (doi:10.3390/agronomy12071552), 2022-06-28
Supplement: s1 [file s1]

## Supplementary materials

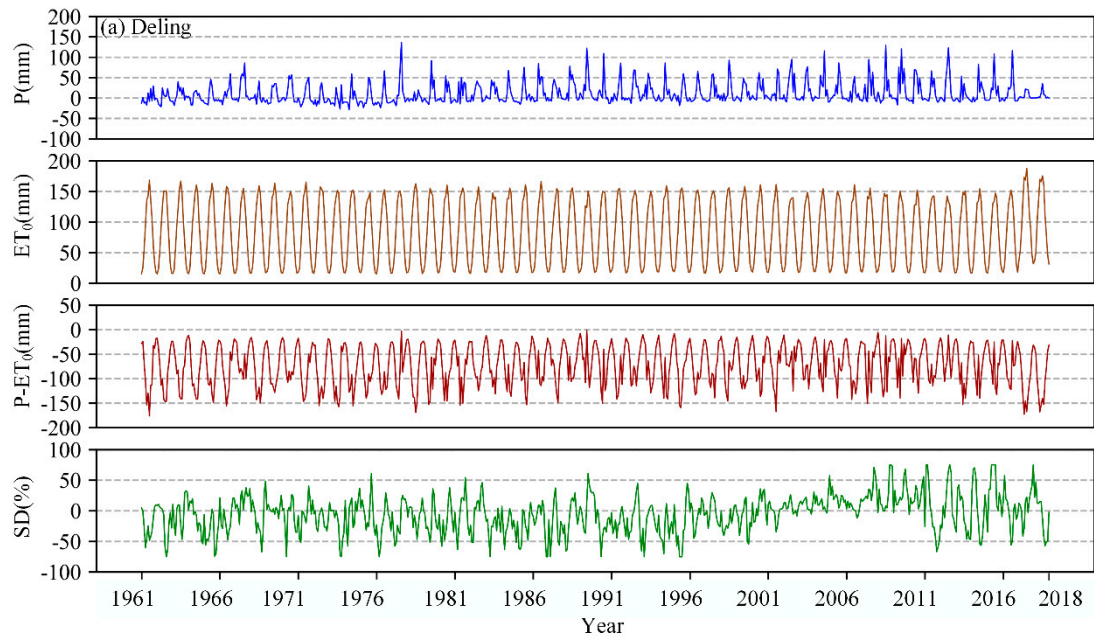

**Figure S1.** Annual variations of monthly P, ET<sub>0</sub>, P-ET<sub>0</sub> and SD over 1961–2018 at the site of Deling.

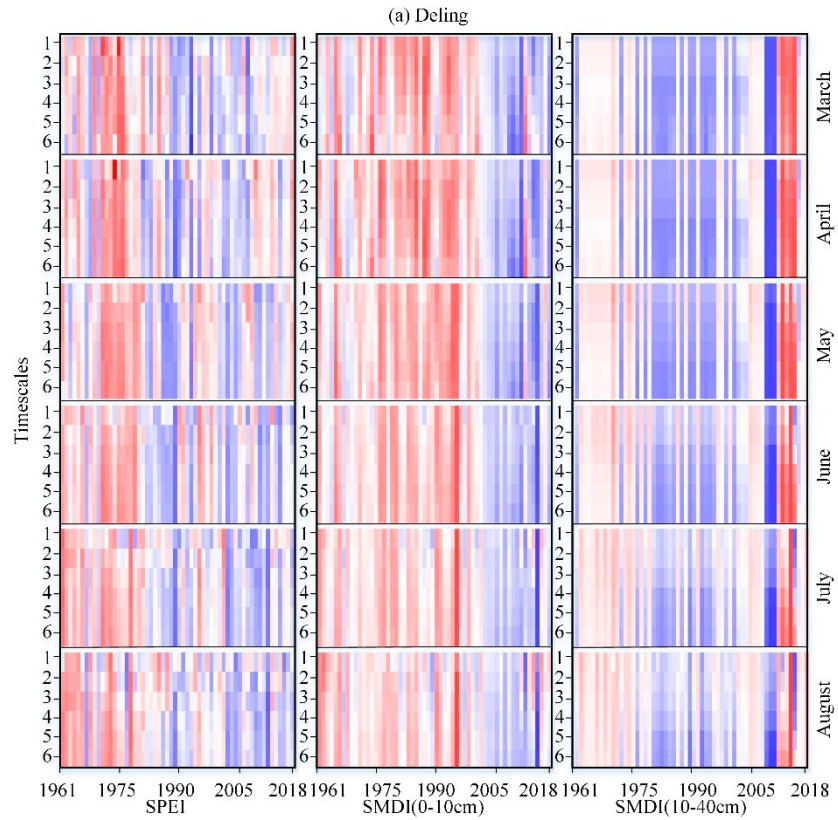

**Figure S2.** Temporal variations of the monthly SPEI or SMDI at the 1- to 6-month timescales during the spring wheat growing seasons at the site of Deling.

**Table S1.** Spring wheat growth period in different sites of Qinghai, China.

| Site      | Growth period |           |          |         |          |          |
|-----------|---------------|-----------|----------|---------|----------|----------|
|           | Sowing        | Emergence | Jointing | Heading | Milking  | Maturity |
|           |               |           |          |         | maturity |          |
| Minhe     | 28 Mar.       | 09 Apr.   | 17 May   | 12 Jun. | 09 Jul.  | 26 Jul.  |
| Ledu      | 11 Mar.       | 05 Apr.   | 19 May   | 10 Jun. | 15 Jul.  | 30 Jul.  |
| Huangyuan | 31 Mar.       | 26 Apr.   | 07 May   | 02 Jul. | 07 Jul.  | 03 Sep.  |
| Huzhu     | 01 Apr.       | 23 Apr.   | 10 Jun.  | 05 Jul. | 04 Aug.  | 02 Sep.  |
| Guide     | 07 Mar.       | 02 Apr.   | 17 May   | 10 Jun. | 15 Jul.  | 30 Jul.  |
| Datong    | 28 Mar.       | 22 Apr.   | 05 Jun.  | 01 Jul. | 05 Aug.  | 01 Sep.  |
| Xunhua    | 28 Feb.       | 28 Mar.   | 14 May   | 30 May  | 30 Jun.  | 22 Jul.  |
| Tongren   | 20 Mar.       | 13 Apr.   | 03 May   | 24 Jun. | 24 Jul.  | 15 Aug.  |

**Table S2.** Genetic coefficients of spring wheat at the selected 8 sites.

| Site   | Spring wheat parameter |       |       |       |       |       |       |
|--------|------------------------|-------|-------|-------|-------|-------|-------|
|        | P1V                    | P1D   | P5    | G1    | G2    | G3    | PHINT |
| Deling | 19.72                  | 38.59 | 783.8 | 16.76 | 37.68 | 1.764 | 72.56 |
| Geer   | 19.70                  | 33.76 | 799.9 | 17.06 | 45.98 | 1.731 | 61.30 |
| Dulan  | 19.12                  | 39.65 | 789.8 | 19.88 | 23.22 | 1.570 | 95.08 |
| Gonghe | 19.57                  | 37.65 | 796.4 | 17.87 | 21.58 | 1.205 | 63.25 |

---

|                            |       |       |        |       |       |       |       |
|----------------------------|-------|-------|--------|-------|-------|-------|-------|
| Minhe                      | 19.91 | 38.34 | 798.8  | 24.15 | 26.96 | 1.616 | 69.65 |
| Nuomu                      | 19.90 | 34.61 | 773.0  | 19.04 | 23.20 | 1.820 | 63.35 |
| Huangyuan                  | 19.67 | 38.67 | 786.1  | 19.74 | 20.89 | 1.942 | 61.40 |
| Huzhu                      | 19.79 | 38.66 | 792.8  | 15.97 | 20.46 | 1.488 | 67.25 |
| <hr/>                      |       |       |        |       |       |       |       |
| Mean                       | 19.67 | 37.49 | 790.08 | 18.81 | 27.50 | 1.64  | 69.23 |
| Standard deviation         | 0.25  | 2.12  | 9.00   | 2.59  | 9.34  | 0.23  | 11.20 |
| Coefficient of variation/% | 1.28  | 5.67  | 1.14   | 13.75 | 33.97 | 13.91 | 16.18 |

---

**Table S3.** Pearson correlation coefficients ( $r$ ) between LAI<sub>max</sub> and drought indices (SPEI, SMDI<sub>0-10</sub> or SMDI<sub>10-40</sub>) at selected 8 sites. (\*\* represents p-value  $\leq 0.05$ , and \* represents p-value  $\leq 0.1$ ).

| Site    | Drought index<br>Timescale<br>Month | SPEI  |       |       |       |       |       | SMDI <sub>0-10</sub> |        |        |        |        |        | SMDI <sub>10-40</sub> |       |       |       |       |       |
|---------|-------------------------------------|-------|-------|-------|-------|-------|-------|----------------------|--------|--------|--------|--------|--------|-----------------------|-------|-------|-------|-------|-------|
|         |                                     | 1     | 2     | 3     | 4     | 5     | 6     | 1                    | 2      | 3      | 4      | 5      | 6      | 1                     | 2     | 3     | 4     | 5     | 6     |
|         |                                     |       |       |       |       |       |       |                      |        |        |        |        |        |                       |       |       |       |       |       |
| De ling | Mar.                                | 0.12  | 0.20  | 0.22* | 0.21* | 0.25* | 0.27* | 0.37**               | 0.36** | 0.37** | 0.37** | 0.37** | 0.38** | -0.11                 | -0.11 | -0.09 | -0.08 | -0.07 | -0.07 |
|         | Apr.                                | -0.05 | 0.05  | 0.09  | 0.11  | 0.10  | 0.13  | 0.40**               | 0.39** | 0.38** | 0.38** | 0.39** | 0.39** | -0.07                 | -0.10 | -0.10 | -0.08 | -0.08 | -0.07 |
|         | May                                 | 0.19  | 0.13  | 0.18  | 0.20  | 0.21* | 0.19  | 0.43**               | 0.43** | 0.43** | 0.43** | 0.44** | 0.44** | 0.00                  | -0.04 | -0.07 | -0.08 | -0.07 | -0.07 |
|         | Jun.                                | 0.04  | 0.16  | 0.13  | 0.15  | 0.17  | 0.18  | 0.36**               | 0.39** | 0.40** | 0.41** | 0.42** | 0.43** | 0.01                  | -0.01 | -0.04 | -0.07 | -0.08 | -0.07 |
|         | Jul.                                | 0.15  | 0.16  | 0.22* | 0.19  | 0.21  | 0.22* | 0.22*                | 0.31** | 0.36** | 0.38** | 0.40** | 0.41** | -0.03                 | -0.02 | -0.03 | -0.06 | -0.08 | -0.09 |
|         | Aug.                                | 0.07  | 0.15  | 0.17  | 0.22* | 0.19  | 0.21* | 0.12                 | 0.22*  | 0.27** | 0.31*  | 0.35** | 0.37** | -0.09                 | -0.07 | -0.05 | -0.06 | -0.07 | -0.09 |
| Geer    | Mar.                                | 0.18  | 0.16  | 0.23* | 0.29* | 0.33* | 0.33* | 0.11                 | 0.03   | -0.05  | -0.16  | -0.22  | -0.22  | -0.06                 | -0.06 | -0.07 | -0.07 | -0.08 | -0.09 |
|         | Apr.                                | -0.12 | 0.03  | 0.03  | 0.11  | 0.17  | 0.22* | 0.14                 | 0.11   | 0.06   | -0.03  | -0.14  | -0.21  | -0.03                 | -0.05 | -0.06 | -0.06 | -0.07 | -0.08 |
|         | May                                 | 0.05  | -0.01 | 0.04  | 0.04  | 0.09  | 0.13  | 0.00                 | 0.05   | 0.03   | -0.01  | -0.09  | -0.16  | 0.01                  | -0.01 | -0.03 | -0.04 | -0.05 | -0.06 |
|         | Jun.                                | 0.03  | 0.05  | 0.01  | 0.04  | 0.04  | 0.07  | -0.07                | -0.05  | -0.02  | -0.03  | -0.07  | -0.12  | 0.03                  | 0.01  | -0.01 | -0.03 | -0.04 | -0.05 |
|         | Jul.                                | 0.04  | 0.04  | 0.04  | 0.02  | 0.04  | 0.04  | -0.13                | -0.10  | -0.07  | -0.06  | -0.07  | -0.10  | -0.05                 | -0.02 | -0.02 | -0.03 | -0.04 | -0.05 |
|         | Aug.                                | -0.09 | -0.03 | -0.01 | 0.00  | -0.02 | 0.00  | -0.08                | -0.08  | -0.07  | -0.05  | -0.05  | -0.06  | -0.10                 | -0.07 | -0.05 | -0.04 | -0.04 | -0.05 |
| Nuomu   | Mar.                                | -0.22 | -0.17 | -0.12 | -0.11 | -0.09 | 0.01  | 0.24*                | 0.23*  | 0.22*  | 0.19   | 0.15   | 0.14   | -0.03                 | -0.01 | 0.01  | 0.02  | 0.03  | 0.05  |
|         | Apr.                                | -0.27 | -0.30 | -0.27 | -0.23 | -0.21 | -0.18 | 0.29**               | 0.28** | 0.25*  | 0.24*  | 0.22*  | 0.18   | 0.00                  | -0.02 | -0.01 | 0.02  | 0.03  | 0.04  |
|         | May                                 | 0.02  | -0.10 | -0.14 | -0.14 | -0.13 | -0.12 | 0.30**               | 0.29** | 0.28** | 0.27** | 0.26** | 0.25** | 0.01                  | 0.00  | -0.03 | -0.02 | 0.01  | 0.02  |
|         | Jun.                                | 0.07  | 0.05  | 0.00  | -0.03 | -0.03 | -0.03 | 0.21                 | 0.26** | 0.26** | 0.25** | 0.25** | 0.25** | 0.09                  | 0.08  | 0.04  | 0.04  | 0.04  | 0.04  |
|         | Jul.                                | 0.04  | 0.07  | 0.05  | 0.01  | 0.00  | -0.01 | 0.11                 | 0.15   | 0.19   | 0.22   | 0.23   | 0.23   | 0.11                  | 0.10  | 0.11  | 0.11  | 0.09  | 0.09  |
|         | Aug.                                | -0.01 | 0.01  | 0.05  | 0.04  | 0.01  | -0.01 | 0.02                 | 0.04   | 0.08   | 0.14   | 0.17   | 0.18   | 0.09                  | 0.10  | 0.12  | 0.13  | 0.12  | 0.11  |
| Dulan   | Mar.                                | 0.12  | 0.04  | 0.09  | 0.01  | 0.03  | 0.05  | 0.18                 | 0.22*  | 0.20   | 0.20   | 0.20   | 0.16   | -0.05                 | -0.04 | -0.03 | -0.03 | -0.02 | -0.02 |

|            |      |         |         |         |         |         |         |        |        |        |        |                   |        |         |         |         |         |         |         |
|------------|------|---------|---------|---------|---------|---------|---------|--------|--------|--------|--------|-------------------|--------|---------|---------|---------|---------|---------|---------|
| Huang-yuan | Apr. | -0.14   | -0.04   | -0.08   | -0.02   | -0.05   | -0.02   | 0.12   | 0.15   | 0.17   | 0.18   | 0.20              | 0.20   | -0.05   | -0.05   | -0.04   | -0.03   | -0.03   | -0.02   |
|            | May  | -0.07   | -0.14   | -0.07   | -0.10   | -0.07   | -0.05   | 0.08   | 0.10   | 0.12   | 0.14   | 0.17              | 0.19   | -0.06   | -0.05   | -0.05   | -0.04   | -0.03   | -0.03   |
|            | Jun. | -0.14   | -0.14   | -0.18   | -0.14   | -0.16   | -0.14   | 0.04   | 0.04   | 0.05   | 0.07   | 0.09              | 0.13   | -0.05   | -0.05   | -0.05   | -0.04   | -0.04   | -0.03   |
|            | Jul. | -0.02   | -0.10   | -0.10   | -0.14   | -0.11   | -0.13   | 0.03   | 0.04   | 0.04   | 0.05   | 0.07              | 0.09   | -0.05   | -0.06   | -0.06   | -0.05   | -0.05   | -0.04   |
|            | Aug. | 0.23*   | 0.10    | 0.00    | -0.02   | -0.06   | -0.03   | 0.13   | 0.09   | 0.09   | 0.08   | 0.09              | 0.11   | 0.02    | -0.01   | -0.01   | -0.02   | -0.03   | -0.04   |
|            | Mar. | -0.24   | -0.29** | -0.29** | -0.25   | -0.24   | -0.15   | 0.13   | 0.15   | 0.15   | 0.15   | 0.14              | 0.15   | -0.03   | -0.03   | -0.03   | 0.01    | 0.04    | 0.08    |
|            | Apr. | -0.10   | -0.22   | -0.25   | -0.26   | -0.23   | -0.24   | 0.24*  | 0.23*  | 0.21*  | 0.20   | 0.19              | 0.17   | 0.01    | -0.01   | -0.01   | 0.00    | 0.03    | 0.05    |
|            | May  | -0.04   | -0.10   | -0.17   | -0.19   | -0.20   | -0.22   | 0.29** | 0.26** | 0.26** | 0.26** | 0.25**            | 0.23   | 0.04    | 0.03    | 0.01    | 0.01    | 0.01    | 0.04    |
| Gonghe     | Jun. | -0.05   | -0.05   | -0.09   | -0.14   | -0.17   | -0.17   | 0.24   | 0.26** | 0.25** | 0.26** | 0.26**            | 0.25   | 0.08    | 0.06    | 0.04    | 0.03    | 0.02    | 0.03    |
|            | Jul. | -0.22   | -0.16   | -0.15   | -0.16   | -0.19   | -0.21   | 0.10   | 0.16   | 0.20   | 0.20   | 0.20              | 0.21   | 0.03    | 0.03    | 0.02    | 0.01    | 0.01    | 0.01    |
|            | Aug. | -0.18   | -0.27** | -0.22   | -0.19   | -0.19   | -0.21   | -0.01  | 0.05   | 0.12   | 0.15   | 0.15              | 0.16   | -0.03   | -0.01   | -0.01   | 0.00    | 0.00    | 0.00    |
|            | Mar. | -0.21   | -0.26** | -0.21   | -0.20   | -0.22   | -0.25** | 0.25** | 0.21   | 0.17   | 0.12   | 0.04              | -0.01  | -0.25** | -0.26** | -0.27** | -0.28** | -0.28** | -0.28** |
|            | Apr. | -0.14   | -0.21   | -0.25   | -0.22   | -0.22   | -0.24   | 0.32** | 0.32** | 0.27** | 0.23*  | 0.18              | 0.10   | -0.22   | -0.25** | -0.26** | -0.27** | -0.28** | -0.28** |
|            | May  | 0.00    | -0.07   | -0.13   | -0.16   | -0.15   | -0.15   | 0.35** | 0.36** | 0.35** | 0.32** | 0.28**            | 0.22*  | -0.19   | -0.21*  | -0.24*  | -0.26** | -0.27** | -0.27** |
|            | Jun. | -0.03   | 0.00    | -0.05   | -0.10   | -0.12   | -0.11   | 0.24*  | 0.31** | 0.32** | 0.32** | 0.29 <sup>v</sup> | 0.26** | -0.19   | -0.20   | -0.23*  | -0.25** | -0.26** | -0.27** |
|            | Jul. | 0.11    | 0.05    | 0.04    | 0.01    | -0.02   | -0.04   | 0.09   | 0.21   | 0.25** | 0.27** | 0.27**            | 0.26** | -0.16   | -0.19   | -0.21   | -0.23   | -0.25** | -0.26** |
| Huzhu      | Aug. | -0.20   | -0.06   | -0.05   | -0.02   | -0.04   | -0.07   | 0.01   | 0.06   | 0.14   | 0.20   | 0.22*             | 0.23*  | -0.09   | -0.15   | -0.17   | -0.20   | -0.22   | -0.25** |
|            | Mar. | -0.08   | -0.12   | -0.11   | -0.08   | -0.08   | -0.10   | 0.10   | 0.07   | 0.04   | 0.00   | -0.01             | 0.01   | -0.16   | -0.18   | -0.15   | -0.09   | -0.06   | -0.02   |
|            | Apr. | -0.30** | -0.24*  | -0.25** | -0.23*  | -0.21*  | -0.20   | 0.03   | 0.02   | 0.01   | 0.00   | -0.02             | -0.02  | -0.07   | -0.12   | -0.13   | -0.10   | -0.07   | -0.04   |
|            | May  | 0.01    | -0.12   | -0.12   | -0.14   | -0.13   | -0.14   | -0.02  | 0.00   | 0.00   | 0.00   | -0.01             | -0.02  | -0.02   | -0.04   | -0.07   | -0.09   | -0.07   | -0.05   |
|            | Jun. | 0.02    | 0.04    | -0.05   | -0.05   | -0.07   | -0.06   | 0.01   | -0.01  | 0.01   | 0.01   | 0.00              | 0.00   | 0.04    | 0.01    | -0.02   | -0.04   | -0.05   | -0.05   |
|            | Jul. | 0.12    | 0.10    | 0.09    | 0.00    | 0.00    | -0.02   | 0.10   | 0.06   | 0.03   | 0.04   | 0.04              | 0.03   | 0.11    | 0.08    | 0.04    | 0.02    | 0.00    | -0.02   |
|            | Aug. | -0.08   | 0.00    | 0.01    | 0.01    | -0.05   | -0.05   | 0.15   | 0.12   | 0.09   | 0.07   | 0.07              | 0.07   | 0.17    | 0.14    | 0.11    | 0.08    | 0.05    | 0.02    |
|            | Mar. | -0.33** | -0.35** | -0.36** | -0.34** | -0.33** | -0.26** | 0.22*  | 0.24*  | 0.25** | 0.25** | 0.24*             | 0.25** | 0.21    | 0.21    | 0.22    | 0.23*   | 0.23*   | 0.24*   |
| Minhe      | Apr. | -0.28** | -0.38** | -0.39** | -0.40** | -0.39** | -0.39** | 0.25** | 0.26** | 0.26** | 0.25** | 0.25**            | 0.24*  | 0.22*   | 0.22*   | 0.21    | 0.22    | 0.23*   | 0.23*   |
|            | May  | -0.24*  | -0.34** | -0.40** | -0.42** | -0.43** | -0.43** | 0.18   | 0.22*  | 0.23*  | 0.24*  | 0.24*             | 0.24*  | 0.19    | 0.20    | 0.20    | 0.20    | 0.21    | 0.22*   |
|            | Jun. | 0.01    | -0.18   | -0.26** | -0.31** | -0.34** | -0.35** | 0.12   | 0.17   | 0.21*  | 0.22*  | 0.23*             | 0.24*  | 0.18    | 0.19    | 0.20    | 0.20    | 0.20    | 0.21    |

---

|      |         |       |       |        |         |         |      |      |      |       |       |        |       |       |       |       |      |      |
|------|---------|-------|-------|--------|---------|---------|------|------|------|-------|-------|--------|-------|-------|-------|-------|------|------|
| Jul. | 0.03    | 0.04  | -0.11 | -0.19  | -0.24   | -0.26** | 0.18 | 0.17 | 0.20 | 0.22* | 0.24* | 0.25** | 0.21  | 0.21* | 0.22* | 0.21* | 0.21 | 0.21 |
| Aug. | -0.33** | -0.21 | -0.17 | -0.25* | -0.30** | -0.33** | 0.20 | 0.21 | 0.19 | 0.21  | 0.23  | 0.25** | 0.22* | 0.21  | 0.21  | 0.21  | 0.21 | 0.20 |

**Table S4.** Pearson correlation coefficients ( $r$ ) between the climatic yield obtained after a five-year moving average and drought indices (SPEI, SMDI<sub>0-10</sub> or SMDI<sub>10-40</sub>) at selected 8 sites. (\*\* represents  $p$ -value  $\leq 0.05$ , and \* represents  $p$ -value  $\leq 0.1$ ).

| Site    | Month | Timescale | SPEI    |         |         |         |         |         | SMDI <sub>0-10</sub> |        |       |       |       |       | SMDI <sub>10-40</sub> |         |         |         |         |         |
|---------|-------|-----------|---------|---------|---------|---------|---------|---------|----------------------|--------|-------|-------|-------|-------|-----------------------|---------|---------|---------|---------|---------|
|         |       |           | 1       | 2       | 3       | 4       | 5       | 6       | 1                    | 2      | 3     | 4     | 5     | 6     | 1                     | 2       | 3       | 4       | 5       | 6       |
| De ling | Mar   |           | 0.11    | 0.01    | -0.10   | -0.08   | -0.06   | 0.00    | 0.03                 | 0.03   | 0.06  | 0.05  | 0.01  | -0.02 | -0.03                 | -0.03   | -0.04   | -0.05   | -0.07   | -0.07   |
|         | Apr   |           | -0.13   | -0.04   | -0.09   | -0.14   | -0.13   | -0.12   | 0.07                 | 0.04   | 0.06  | 0.07  | 0.06  | 0.03  | -0.05                 | -0.04   | -0.04   | -0.04   | -0.05   | -0.06   |
|         | May   |           | -0.22*  | -0.27** | -0.20   | -0.22*  | -0.25*  | -0.24*  | 0.05                 | 0.05   | 0.05  | 0.05  | 0.04  | 0.03  | -0.07                 | -0.06   | -0.04   | -0.04   | -0.04   | -0.04   |
|         | Jun   |           | -0.14   | -0.23*  | -0.24*  | -0.20   | -0.22*  | -0.24*  | -0.04                | 0.00   | 0.01  | 0.01  | 0.01  | 0.00  | -0.12                 | -0.10   | -0.09   | -0.05   | -0.05   | -0.05   |
|         | Jul   |           | -0.34** | -0.33** | -0.35** | -0.37** | -0.33** | -0.34** | -0.19                | -0.13  | -0.08 | -0.06 | -0.06 | -0.06 | -0.19                 | -0.17   | -0.14   | -0.13   | -0.10   | -0.09   |
|         | Aug   |           | -0.05   | -0.24*  | -0.28*  | -0.31** | -0.33** | -0.30** | -0.27**              | -0.22* | -0.17 | -0.13 | -0.12 | -0.11 | -0.30**               | -0.26** | -0.23*  | -0.20   | -0.18   | -0.14   |
| Geer    | Mar   |           | 0.06    | 0.00    | 0.02    | 0.03    | 0.05    | 0.01    | 0.21*                | 0.21*  | 0.16  | 0.09  | 0.00  | -0.03 | -0.06                 | -0.06   | -0.07   | -0.07   | -0.08   | -0.08   |
|         | Apr   |           | 0.11    | 0.07    | 0.05    | 0.07    | 0.06    | 0.05    | 0.22*                | 0.21*  | 0.21* | 0.18  | 0.11  | 0.03  | -0.06                 | -0.06   | -0.06   | -0.07   | -0.07   | -0.08   |
|         | May   |           | 0.06    | 0.09    | 0.08    | 0.06    | 0.06    | 0.06    | 0.20                 | 0.21*  | 0.20  | 0.21  | 0.18  | 0.12  | -0.02                 | -0.03   | -0.04   | -0.05   | -0.06   | -0.06   |
|         | Jun   |           | 0.16    | 0.14    | 0.15    | 0.14    | 0.12    | 0.12    | 0.13                 | 0.17   | 0.19  | 0.19  | 0.20  | 0.18  | -0.03                 | -0.04   | -0.05   | -0.05   | -0.06   | -0.06   |
|         | Jul   |           | 0.18    | 0.19    | 0.17    | 0.17    | 0.16    | 0.15    | 0.01                 | 0.08   | 0.14  | 0.17  | 0.17  | 0.17  | -0.09                 | -0.08   | -0.07   | -0.07   | -0.07   | -0.07   |
|         | Aug   |           | 0.15    | 0.18    | 0.20    | 0.17    | 0.17    | 0.17    | -0.06                | -0.01  | 0.06  | 0.12  | 0.16  | 0.16  | -0.13                 | -0.12   | -0.10   | -0.09   | -0.09   | -0.09   |
| Nuomu   | Mar   |           | 0.00    | -0.04   | -0.07   | -0.06   | -0.07   | -0.05   | 0.19                 | 0.14   | 0.05  | -0.03 | -0.13 | -0.19 | -0.27**               | -0.26** | -0.26** | -0.25** | -0.24** | -0.22*  |
|         | Apr   |           | 0.13    | 0.11    | 0.12    | 0.13    | 0.17    | 0.19    | 0.22*                | 0.17   | 0.13  | 0.06  | -0.02 | -0.11 | -0.28**               | -0.28** | -0.27** | -0.26** | -0.25** | -0.24*  |
|         | May   |           | 0.18    | 0.19    | 0.18    | 0.18    | 0.18    | 0.20    | 0.12                 | 0.21   | 0.15  | 0.11  | 0.04  | -0.02 | -0.27**               | -0.28** | -0.28** | -0.27** | -0.27** | -0.25** |
|         | Jun   |           | 0.24*   | 0.24*   | 0.24*   | 0.24*   | 0.23*   | 0.23*   | -0.02                | 0.04   | 0.09  | 0.09  | 0.06  | 0.01  | -0.15                 | -0.17   | -0.22*  | -0.18   | -0.20   | -0.21   |
|         | Jul   |           | 0.16    | 0.23*   | 0.23*   | 0.23*   | 0.23*   | 0.23*   | -0.10                | -0.10  | -0.05 | -0.01 | 0.00  | -0.02 | -0.12                 | -0.13   | -0.14   | -0.13   | -0.15   | -0.15   |
|         | Aug   |           | 0.15    | 0.17    | 0.23*   | 0.22*   | 0.23*   | 0.22*   | -0.25*               | -0.19  | -0.18 | -0.13 | -0.10 | -0.09 | -0.14                 | -0.12   | -0.12   | -0.11   | -0.12   | -0.13   |
| Dulan   | Mar   |           | 0.16    | -0.04   | -0.06   | -0.06   | 0.02    | 0.10    | 0.05                 | 0.07   | 0.08  | 0.09  | 0.10  | 0.12  | 0.10                  | 0.10    | 0.10    | 0.10    | 0.09    | 0.09    |
|         | Apr   |           | -0.17   | -0.12   | -0.23*  | -0.24*  | -0.22*  | -0.17   | -0.03                | 0.00   | 0.02  | 0.05  | 0.07  | 0.08  | 0.07                  | 0.08    | 0.09    | 0.09    | 0.09    | 0.09    |
|         | May   |           | 0.07    | -0.01   | 0.00    | -0.09   | -0.12   | -0.12   | -0.06                | -0.05  | -0.03 | -0.01 | 0.02  | 0.05  | 0.03                  | 0.06    | 0.08    | 0.08    | 0.08    | 0.08    |
|         | Jun   |           | 0.20    | 0.19    | 0.15    | 0.16    | 0.12    | 0.11    | -0.02                | -0.02  | -0.02 | -0.01 | 0.01  | 0.04  | 0.17                  | 0.14    | 0.13    | 0.12    | 0.12    | 0.11    |

|            |     |         |         |         |         |         |         |        |        |        |        |        |        |       |       |       |       |       |       |
|------------|-----|---------|---------|---------|---------|---------|---------|--------|--------|--------|--------|--------|--------|-------|-------|-------|-------|-------|-------|
| Huang-yuan | Jul | -0.02   | 0.18    | 0.17    | 0.14    | 0.14    | 0.10    | 0.01   | -0.02  | -0.03  | -0.02  | -0.01  | 0.01   | 0.19  | 0.18  | 0.16  | 0.16  | 0.15  | 0.14  |
|            | Aug | -0.08   | -0.06   | 0.14    | 0.14    | 0.10    | 0.10    | -0.02  | 0.00   | -0.01  | -0.03  | -0.03  | -0.03  | 0.13  | 0.16  | 0.16  | 0.15  | 0.15  | 0.15  |
|            | Mar | 0.09    | 0.03    | 0.04    | 0.08    | 0.07    | 0.08    | 0.20   | 0.21*  | 0.20*  | 0.16   | 0.13   | 0.10   | 0.00  | 0.01  | 0.01  | 0.01  | 0.01  | 0.00  |
|            | Apr | 0.08    | 0.01    | -0.03   | -0.03   | -0.04   | -0.06   | 0.21   | 0.21   | 0.20   | 0.19   | 0.17   | 0.14   | -0.02 | 0.00  | 0.00  | 0.00  | 0.01  | 0.00  |
|            | May | 0.04    | 0.06    | 0.02    | 0.00    | 0.00    | -0.01   | 0.18   | 0.19   | 0.19   | 0.19   | 0.18   | 0.17   | -0.02 | -0.02 | -0.01 | -0.01 | 0.00  | 0.00  |
|            | Jun | 0.03    | 0.05    | 0.07    | 0.04    | 0.03    | 0.03    | 0.13   | 0.15   | 0.15   | 0.16   | 0.16   | 0.16   | -0.04 | -0.03 | -0.03 | -0.02 | -0.02 | -0.01 |
|            | Jul | 0.06    | 0.05    | 0.05    | 0.07    | 0.05    | 0.04    | 0.03   | 0.09   | 0.11   | 0.12   | 0.13   | 0.13   | -0.07 | -0.06 | -0.05 | -0.04 | -0.04 | -0.03 |
|            | Aug | 0.09    | 0.08    | 0.08    | 0.08    | 0.10    | 0.08    | -0.01  | 0.01   | 0.06   | 0.08   | 0.09   | 0.10   | -0.08 | -0.08 | -0.07 | -0.05 | -0.05 | -0.04 |
| Gonghe     | Mar | 0.07    | 0.05    | 0.11    | 0.16    | 0.12    | 0.06    | 0.22*  | 0.19   | 0.17   | 0.16   | 0.12   | 0.09   | -0.14 | -0.12 | -0.14 | -0.14 | -0.13 | -0.13 |
|            | Apr | 0.04    | 0.02    | 0.00    | 0.02    | 0.03    | 0.00    | 0.30** | 0.26** | 0.24*  | 0.22*  | 0.20   | 0.15   | -0.12 | -0.14 | -0.13 | -0.14 | -0.14 | -0.13 |
|            | May | 0.16    | 0.13    | 0.11    | 0.10    | 0.12    | 0.12    | 0.37** | 0.36** | 0.33** | 0.32** | 0.30** | 0.26** | -0.04 | -0.08 | -0.12 | -0.12 | -0.13 | -0.13 |
|            | Jun | -0.11   | 0.04    | 0.03    | 0.03    | 0.03    | 0.05    | 0.30** | 0.32** | 0.32** | 0.30** | 0.29** | 0.27** | -0.02 | -0.04 | -0.08 | -0.11 | -0.12 | -0.13 |
|            | Jul | 0.17    | 0.05    | 0.09    | 0.10    | 0.09    | 0.09    | 0.14   | 0.25*  | 0.27** | 0.28** | 0.27** | 0.26** | -0.04 | -0.04 | -0.06 | -0.08 | -0.11 | -0.11 |
|            | Aug | 0.02    | 0.12    | 0.04    | 0.10    | 0.11    | 0.11    | 0.07   | 0.11   | 0.20   | 0.22*  | 0.23*  | 0.23*  | -0.05 | -0.04 | -0.05 | -0.06 | -0.09 | -0.11 |
|            | Mar | 0.21*   | 0.15    | 0.16    | 0.16    | 0.09    | 0.14    | 0.15   | 0.12   | 0.10   | 0.06   | 0.01   | -0.01  | 0.05  | 0.04  | 0.03  | 0.01  | -0.02 | -0.03 |
|            | Apr | -0.01   | 0.10    | 0.11    | 0.15    | 0.16    | 0.14    | 0.17   | 0.16   | 0.14   | 0.12   | 0.07   | 0.03   | 0.03  | 0.03  | 0.03  | 0.02  | 0.00  | -0.01 |
| Huzhu      | May | 0.10    | 0.07    | 0.13    | 0.13    | 0.16    | 0.16    | 0.11   | 0.13   | 0.12   | 0.11   | 0.09   | 0.07   | 0.01  | 0.02  | 0.02  | 0.02  | 0.02  | 0.00  |
|            | Jun | 0.14    | 0.13    | 0.11    | 0.15    | 0.15    | 0.17    | 0.08   | 0.09   | 0.10   | 0.10   | 0.09   | 0.09   | 0.03  | 0.02  | 0.02  | 0.02  | 0.02  | 0.01  |
|            | Jul | -0.09   | 0.00    | 0.04    | 0.03    | 0.07    | 0.08    | 0.04   | 0.05   | 0.08   | 0.10   | 0.10   | 0.10   | 0.03  | 0.04  | 0.04  | 0.03  | 0.02  | 0.02  |
|            | Aug | 0.21*   | 0.10    | 0.11    | 0.13    | 0.12    | 0.14    | 0.05   | 0.05   | 0.08   | 0.09   | 0.10   | 0.11   | 0.04  | 0.05  | 0.05  | 0.05  | 0.04  | 0.04  |
|            | Mar | -0.07   | -0.12   | -0.10   | -0.11   | -0.09   | -0.11   | 0.07   | 0.06   | 0.05   | 0.04   | 0.02   | 0.03   | -0.06 | -0.06 | -0.04 | -0.02 | -0.01 | 0.00  |
|            | Apr | -0.33** | -0.38** | -0.39** | -0.37** | -0.36** | -0.33** | 0.03   | 0.04   | 0.04   | 0.03   | 0.02   | 0.01   | -0.04 | -0.04 | -0.05 | -0.03 | -0.02 | -0.01 |
|            | May | -0.13   | -0.30** | -0.31** | -0.33** | -0.33** | -0.32** | -0.05  | -0.01  | 0.01   | 0.00   | 0.00   | -0.01  | -0.08 | -0.06 | -0.06 | -0.06 | -0.05 | -0.03 |
|            | Jun | -0.02   | -0.11   | -0.23*  | -0.26** | -0.28** | -0.28** | -0.03  | -0.04  | -0.01  | -0.01  | -0.02  | -0.02  | -0.08 | -0.07 | -0.06 | -0.06 | -0.06 | -0.05 |
| Minhe      | Jul | 0.05    | 0.02    | -0.06   | -0.17   | -0.20   | -0.22   | 0.03   | -0.01  | -0.03  | -0.03  | -0.02  | -0.03  | -0.02 | -0.05 | -0.05 | -0.05 | -0.05 | -0.05 |
|            | Aug | -0.12   | -0.05   | -0.06   | -0.11   | -0.19   | -0.22   | 0.08   | 0.06   | 0.02   | 0.00   | 0.00   | -0.01  | 0.03  | 0.02  | -0.02 | -0.03 | -0.04 | -0.05 |
